# Supplementary material for: DMA, a Small Molecule, Increases Median Survival and Reduces Radiation-Induced Xerostomia via the Activation of the ERK1/2 Pathway in Oral Squamous Cell Carcinoma
Source: MDPI journal article supplement (doi:10.3390/cancers14194908), 2022-10-07
Supplement: s1 [file s1]

# fastp report

## Summary

### General

|                               |                                                                                              |
|-------------------------------|----------------------------------------------------------------------------------------------|
| fastp version:                | 0.20.0 ( <a href="https://github.com/OpenGene/fastp">https://github.com/OpenGene/fastp</a> ) |
| sequencing:                   | paired end (150 cycles + 150 cycles)                                                         |
| mean length before filtering: | 148bp, 147bp                                                                                 |
| mean length after filtering:  | 147bp, 147bp                                                                                 |
| duplication rate:             | 8.521677%                                                                                    |
| Insert size peak:             | 239                                                                                          |

### Before filtering

|              |                         |
|--------------|-------------------------|
| total reads: | 35.108356 M             |
| total bases: | 5.193082 G              |
| Q20 bases:   | 5.120669 G (98.605586%) |
| Q30 bases:   | 4.969532 G (95.695227%) |
| GC content:  | 52.645179%              |

### After filtering

|              |                         |
|--------------|-------------------------|
| total reads: | 35.101238 M             |
| total bases: | 5.179270 G              |
| Q20 bases:   | 5.107252 G (98.609487%) |
| Q30 bases:   | 4.956733 G (95.703304%) |
| GC content:  | 52.652993%              |

### Filtering result

|                         |                          |
|-------------------------|--------------------------|
| reads passed filters:   | 35.101238 M (99.979726%) |
| reads with low quality: | 2 (0.000006%)            |
| reads with too many N:  | 7.116000 K (0.020269%)   |
| reads too short:        | 0 (0.000000%)            |

## Adapters

### Adapter or bad ligation of read1

The input has little adapter percentage (~0.238992%), probably it's trimmed before.

| Sequence                | Occurrences |
|-------------------------|-------------|
| A                       | 45459       |
| AG                      | 46450       |
| AGA                     | 45893       |
| AGAT                    | 45005       |
| AGATC                   | 44722       |
| AGATCG                  | 44215       |
| AGATCGG                 | 44403       |
| AGATCGGA                | 43185       |
| AGATCGGAA               | 41891       |
| AGATCGGAAG              | 41834       |
| AGATCGGAAGA             | 41314       |
| AGATCGGAAGAG            | 40792       |
| AGATCGGAAGAGC           | 40660       |
| AGATCGGAAGAGCA          | 40029       |
| AGATCGGAAGAGCAC         | 38972       |
| AGATCGGAAGAGCACA        | 38048       |
| other adapter sequences | 37438       |

### Adapter or bad ligation of read2

The input has little adapter percentage (~0.253582%), probably it's trimmed before.

| Sequence | Occurrences |
|----------|-------------|
| A        | 48721       |

|                         |       |
|-------------------------|-------|
| AG                      | 47013 |
| AGA                     | 45799 |
| AGAT                    | 44734 |
| AGATC                   | 44756 |
| AGATCG                  | 44069 |
| AGATCGG                 | 43994 |
| AGATCGGA                | 42800 |
| AGATCGGAA               | 41912 |
| AGATCGGAAG              | 41732 |
| AGATCGGAAGA             | 40784 |
| AGATCGGAAGAG            | 40502 |
| AGATCGGAAGAGC           | 40283 |
| AGATCGGAAGAGCG          | 41593 |
| AGATCGGAAGAGCGT         | 36790 |
| AGATCGGAAGAGCGTC        | 37370 |
| other adapter sequences | 69603 |

## Duplication

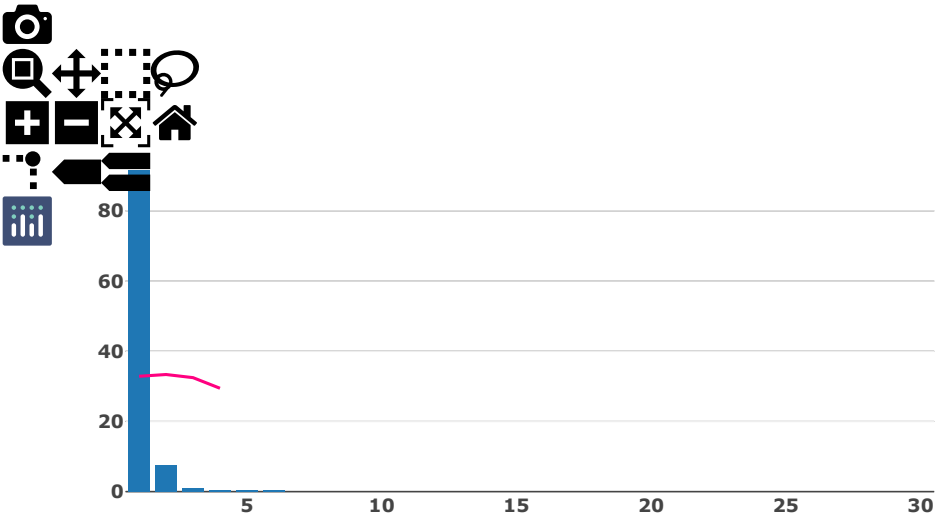

## Insert size estimation

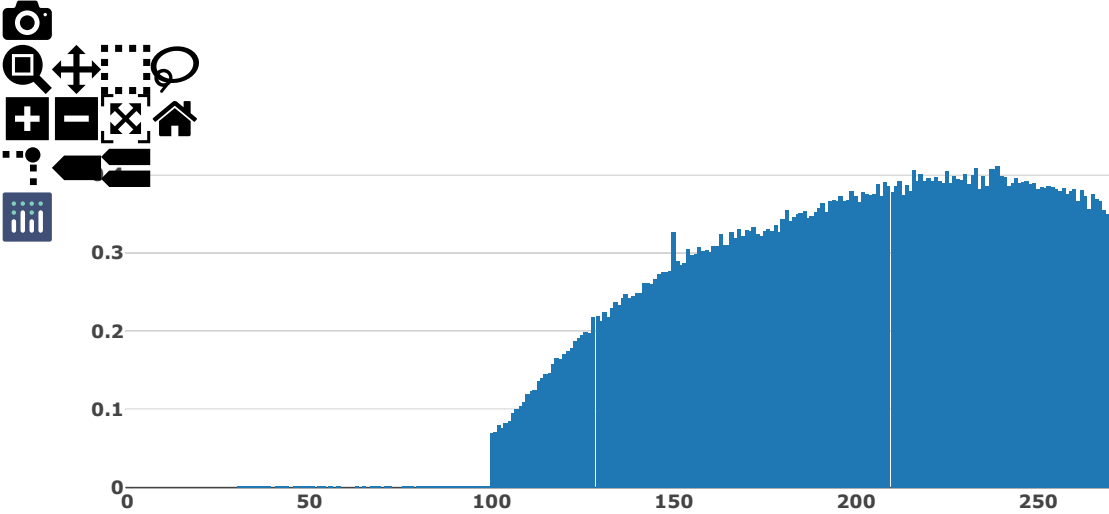

This estimation is based on paired-end overlap analysis, and there are 47.178487% reads found not overlapped. The nonoverlapped read pairs may have insert size <30 or >270, or contain too much sequencing errors to be detected as overlapped.

## Before filtering

Before filtering: read1: quality

Value of each position will be shown on mouse over.

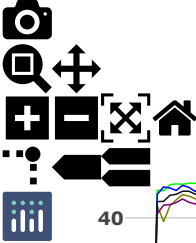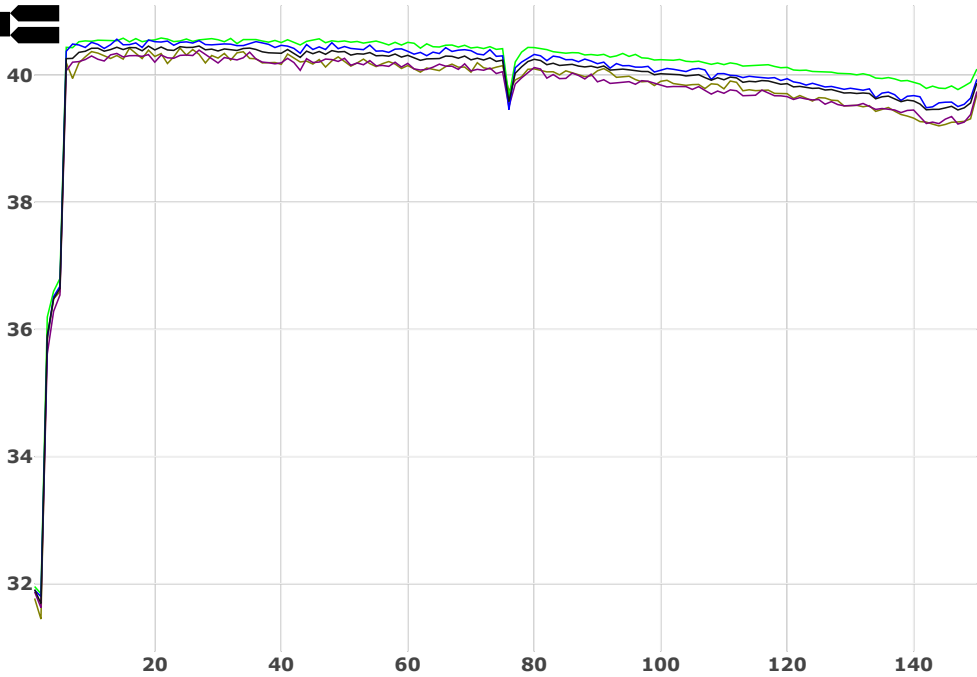

Before filtering: read1: base contents

Value of each position will be shown on mouse over.

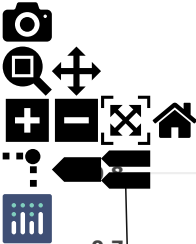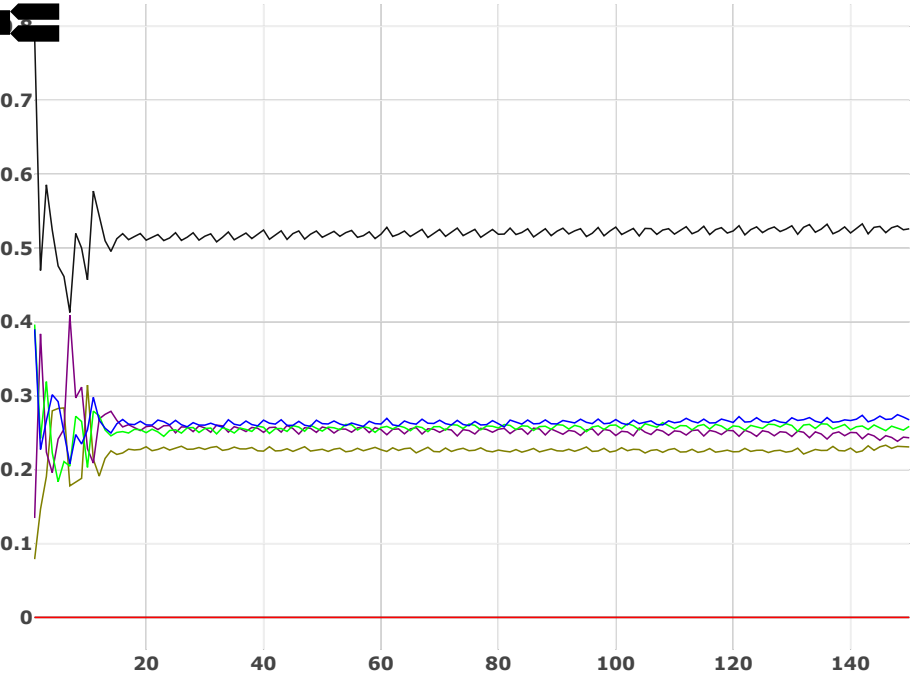

Before filtering: read1: KMER counting

Darker background means larger counts. The count will be shown on mouse over.

|     | AA    | AT    | AC    | AG    | TA    | TT     | TC     | TG     | CA    | CT    | CC    | CG    | GA    | GT    | GC    | GG    |
|-----|-------|-------|-------|-------|-------|--------|--------|--------|-------|-------|-------|-------|-------|-------|-------|-------|
| AAA | AAAAA | AAAAT | AAAAC | AAAAG | AAATA | AAATT  | AAATC  | AAATG  | AAACA | AAACT | AAACC | AAACG | AAAGA | AAAGT | AAAGC | AAAGG |
| AAT | AATAA | AATAT | AATAC | AATAG | AATTA | AATTT  | AATTC  | AATTG  | AATCA | AATCT | AATCC | AATCG | AATGA | AATGT | AATGC | AATGG |
| AAC | AACAA | AACAT | AACAC | AACAG | AACTA | AAC TT | AAC TC | AAC TG | AACCA | AACCT | AACCC | AACCG | AACGA | AACGT | AACGC | AACGG |
| AAG | AAGAA | AAGAT | AAGAC | AAGAG | AAGTA | AAGTT  | AAGTC  | AAGTG  | AAGCA | AAGCT | AAGCC | AAGCG | AAGGA | AAGGT | AAGGC | AAGGG |
| ATA | ATAAA | ATAAT | ATAAC | ATAAG | ATATA | ATATT  | ATATC  | ATATG  | ATACA | ATACT | ATACC | ATACG | ATAGA | ATAGT | ATAGC | ATAGG |
| ATT | ATTAA | ATTAT | ATTAC | ATTAG | ATTTA | ATTTT  | ATTTT  | ATTTG  | ATTCA | ATTCT | ATTCC | ATTCT | ATTGA | ATTGT | ATTGC | ATTGG |
| ATC | ATCAA | ATCAT | ATCAC | ATCAG | ATCTA | ATCTT  | ATCTC  | ATCTG  | ATCCA | ATCCT | ATCCC | ATCCG | ATCGA | ATCGT | ATCGC | ATCGG |
| ATG | ATGAA | ATGAT | ATGAC | ATGAG | ATGTA | ATGTT  | ATGTC  | ATGTG  | ATGCA | ATGCT | ATGCC | ATGCG | ATGGA | ATGGT | ATGGC | ATGGG |
| ACA | ACAAA | ACAAT | ACAAC | ACAAG | ACATA | ACATT  | ACATC  | ACATG  | ACACA | ACACT | ACACC | ACACG | ACAGA | ACAGT | ACAGC | ACAGG |

|      |       |        |        |        |        |        |        |        |        |       |       |        |        |        |        |        |
|------|-------|--------|--------|--------|--------|--------|--------|--------|--------|-------|-------|--------|--------|--------|--------|--------|
| ACT  | ACTAA | ACTAT  | ACTAC  | ACTAG  | ACTTA  | ACTTT  | ACTTC  | ACTTG  | ACTCA  | ACTCT | ACTCC | ACTCG  | ACTGA  | ACTGT  | ACTGC  | ACTGG  |
| ACC  | ACCAA | ACCAT  | ACCAC  | ACCAG  | ACCTA  | ACCTT  | ACCTC  | ACCTG  | ACCCA  | ACCGT | ACCCC | ACCCG  | ACCGA  | ACCGT  | ACCGC  | ACCGG  |
| ACG  | ACGAA | ACGAT  | ACGAC  | ACGAG  | ACGTA  | ACGTT  | ACGTC  | ACGTG  | ACGCA  | ACGGT | ACGCC | ACCGG  | ACGGA  | ACGGT  | ACGGC  | ACGGG  |
| AGA  | AGAAA | AGAAAT | AGAAC  | AGAAG  | AGATA  | AGATT  | AGATC  | AGATG  | AGACA  | AGACT | AGACC | AGACG  | AGAGA  | AGAGT  | AGAGC  | AGAGG  |
| AGT  | AGTAA | AGTAT  | AGTAC  | AGTAG  | AGTTA  | AGTTT  | AGTTC  | AGTTG  | AGTCA  | AGTCT | AGTCC | AGTCG  | AGTGA  | AGGT   | AGTGC  | AGTGG  |
| AGC  | AGCAA | AGCAT  | AGCAC  | AGCAG  | AGCTA  | AGCTT  | AGCTC  | AGCTG  | AGCCA  | AGCCT | AGCCC | AGCCG  | AGCGA  | AGCGT  | AGCGC  | AGCGG  |
| AGG  | AGGAA | AGGAT  | AGGAC  | AGGAG  | AGGTA  | AGGTT  | AGGTC  | AGGTG  | AGGCA  | AGGGT | AGGCC | AGGGG  | AGGGA  | AGGGT  | AGGGC  | AGGGG  |
| TAA  | TAAAA | TAAAT  | TAAAC  | TAAAG  | TAATA  | TAATT  | TAATC  | TAATG  | TAACA  | TAACT | TAACC | TAACG  | TAAGA  | TAAGT  | TAAGC  | TAAAG  |
| TAT  | TATAA | TATAT  | TATAC  | TATAG  | TATTA  | TATTT  | TATTC  | TATTG  | TATCA  | TATCT | TATCC | TATCG  | TATGA  | TATGT  | TATGC  | TATGG  |
| TAC  | TACAA | TACAT  | TACAC  | TACAG  | TACTA  | TACTT  | TACTC  | TACTG  | TACCA  | TACCT | TACCC | TACCG  | TACGA  | TACGT  | TACGC  | TACGG  |
| TAG  | TAGAA | TAGAT  | TAGAC  | TAGAG  | TAGTA  | TAGTT  | TAGTC  | TAGTG  | TAGCA  | TAGCT | TAGCC | TAGCG  | TAGGA  | TAGGT  | TAGGC  | TAGGG  |
| TTA  | TTAAA | TTAAT  | TTAAC  | TTAAG  | TTATA  | TTATT  | TTATC  | TTATG  | TTACA  | TTACT | TTACC | TTACG  | TTAGA  | TTAGT  | TTAGC  | TTAGG  |
| TTT  | TTTAA | TTTAT  | TTTAC  | TTTAG  | TTTTA  | TTTTT  | TTTTC  | TTTTG  | TTTCA  | TTTCT | TTTCC | TTTCG  | TTTGA  | TTTGT  | TTTGC  | TTTGG  |
| TTC  | TTCAA | TTCAT  | TTCAC  | TTCAG  | TTCTA  | TTCTT  | TTCTC  | TTCTG  | TTCCA  | TTCCT | TTCCG | TTCCG  | TTCGA  | TTCGT  | TTCGC  | TTCGG  |
| TTG  | TTGAA | TTGAT  | TTGAC  | TTGAG  | TTGTA  | TTGTT  | TTGTC  | TTGTG  | TTGCA  | TTGCT | TTGCC | TTGGG  | TTGGA  | TTGGT  | TTGGC  | TTGGG  |
| TCa  | TCAAA | TCAAAT | TCAAC  | TCAAG  | TCATA  | TCATT  | TCATC  | TCATG  | TCACA  | TCACT | TCACC | TCACG  | TCAGA  | TCAGT  | TCAGC  | TCAGG  |
| TCT  | TCtaa | TCTAT  | TCTAC  | TCTAG  | TCTTA  | TCTTT  | TCTTC  | TCTTG  | TCTCA  | TCTCT | TCTCC | TCTCG  | TCTGA  | TCTGT  | TCTGC  | TCTGG  |
| TCG  | TCGAA | TCGAT  | TCGAC  | TCGAG  | TCGTA  | TCGTT  | TCGTC  | TCGTG  | TCGCA  | TCGCT | TCGCC | TCGGG  | TCGGA  | TCGGT  | TCGGC  | TCGGG  |
| TGA  | TGAAA | TGAAT  | TGAAC  | TGAAG  | TGATA  | TGATT  | TGATC  | TGATG  | TGACA  | TGACT | TGACC | TGACG  | TGAGA  | TGAGT  | TGAGC  | TGAGG  |
| TGT  | TGTAA | TGTAT  | TGTAC  | TGTAG  | TGTTA  | TGTTT  | TGTTC  | TGTTG  | TGTCA  | TGTCT | TGTCC | TGTGG  | TGTGA  | TGTGT  | TGTGC  | TGTGG  |
| TGC  | TGCAA | TGCAT  | TGCAC  | TGCAG  | TGCTA  | TGCTT  | TGCTC  | TGCTG  | TGCCA  | TGCGT | TGCCG | TGCCG  | TGCGA  | TGCGT  | TGCGC  | TGCGG  |
| TGG  | TGAAA | TGAAT  | TGAAC  | TGAAG  | TGATA  | TGATT  | TGATC  | TGATG  | TGACA  | TGACT | TGACC | TGACG  | TGAGA  | TGAGT  | TGAGC  | TGAGG  |
| CAAT | CAATA | CAATAT | CAAAC  | CAAAG  | CAATA  | CAATT  | CAATC  | CAATG  | CAACA  | CAACT | CAACC | CAACG  | CAAGA  | CAAGT  | CAAGC  | CAAGG  |
| CAT  | CTTAA | CATAT  | CATAC  | CATAG  | CATTA  | CATTT  | CATTC  | CATTG  | CATCA  | CATCT | CATCC | CATCG  | CATGA  | CATGT  | CATGC  | CATGG  |
| CAC  | CGAAA | CACAT  | CACAC  | CACAG  | CACTA  | CACTT  | CACTC  | CAC TG | CACCA  | CACCT | CACCC | CACCG  | CACGA  | CACGT  | CACGC  | CACGG  |
| CAG  | CGAAA | CAGAT  | CAGAC  | CAGAG  | CAGTA  | CAGTT  | CAGTC  | CAGTG  | CAGCA  | CAGCT | CAGCC | CAGCG  | CAGGA  | CAGGT  | CAGGC  | CAGGG  |
| CTA  | CTAAA | CTAAT  | CTAAC  | CTAAG  | CTATA  | CTATT  | CTATC  | CTATG  | CTACA  | CTACT | CTACC | CTACG  | CTAGA  | CTAGT  | CTAGC  | CTAGG  |
| CTT  | CTTAA | CTTAT  | CTTAC  | CTTAG  | CTTTA  | CTTTT  | CTTTC  | CTTTG  | CTTCA  | CTTCT | CTTCC | CTTCG  | CTTGA  | CTTGT  | CTTGC  | CTTGG  |
| CTC  | CTCAA | CTCAT  | CTCAC  | CTCAG  | CTCTA  | CTCTT  | CTCTC  | CTCTG  | CTCCA  | CTCCT | CTCCG | CTCCG  | CTCGA  | CTCGT  | CTCGC  | CTCGG  |
| CTG  | CTGAA | CTGAT  | CTGAC  | CTGAG  | CTGTA  | CTGTT  | CTGTC  | CTGTG  | CTGCA  | CTGCT | CTGCC | CTGGG  | CTGGA  | CTGGT  | CTGGC  | CTGGG  |
| CCA  | CAAAA | CAATAT | CAACAC | CAAAG  | CAATA  | CAATT  | CAATC  | CAATG  | CAACA  | CAACT | CAACC | CAACG  | CAAGA  | CAAGT  | CAAGC  | CAAGG  |
| CCT  | CTTAA | CCTAT  | CCTAC  | CCTAG  | CCTTA  | CCTTT  | CCTTC  | CCTTG  | CCTCA  | CCTCT | CCTCC | CCTCG  | CCTGA  | CCTGT  | CCTGC  | CCTGG  |
| CCC  | CGAAA | CGCAT  | CGCAC  | CGCAG  | CGCTA  | CGCTT  | CGCTC  | CGCTG  | CGCCA  | CGCGT | CGCCG | CGCCG  | CGCGA  | CGCGT  | CGCGC  | CGCGG  |
| CCG  | CGGAA | CGGAT  | CGGAC  | CGGAG  | CGGTA  | CGGTT  | CGGTC  | CGGTG  | CGGCA  | CGGCT | CGGCC | CGGGG  | CGGGA  | CGGGT  | CGGGC  | CGGGG  |
| CBA  | CGAAA | CGAAT  | CGAAC  | CGAAG  | CGATA  | CGATT  | CGATC  | CGATG  | CGACA  | CGACT | CGACC | CGACG  | CGAGA  | CGAGT  | CGAGC  | CGAGG  |
| CBT  | CGTAA | CGTAT  | CGTAC  | CGTAG  | CGTTA  | CGTTT  | CGTTC  | CGTTG  | CGTCA  | CGTCT | CGTCC | CGTCG  | CGTGA  | CGTGT  | CGTGC  | CGTGG  |
| CBC  | CGCAA | CGCAT  | CGCAC  | CGCAG  | CGCTA  | CGCTT  | CGCTC  | CGCTG  | CGCCA  | CGCGT | CGCCG | CGCCG  | CGCGA  | CGCGT  | CGCGC  | CGCGG  |
| CAG  | CGGAA | CGGAT  | CGGAC  | CGGAG  | CGGTA  | CGGTT  | CGGTC  | CGGTG  | CGGCA  | CGGCT | CGGCC | CGGGG  | CGGGA  | CGGGT  | CGGGC  | CGGGG  |
| GAA  | GAATA | GAATAT | GAACAC | GAAGAG | GAATA  | GAATT  | GAATC  | GAATG  | GAACA  | GAACT | GAACC | GAACG  | GAAGA  | GAAGT  | GAAGC  | GAAGG  |
| GAT  | GATAA | GATAT  | GATAC  | GATAG  | GATTA  | GATTT  | GATTC  | GATTG  | GATCA  | GATCT | GATCC | GATCG  | GATGA  | GATGT  | GATGC  | GATGG  |
| GAC  | GACAA | GACAT  | GACAC  | GACAG  | GACTA  | GACTT  | GACTC  | GACTG  | GACCA  | GACCT | GACCC | GACCG  | GACGA  | GACGT  | GACGC  | GACGG  |
| GAG  | GAGAA | GAGAT  | GAGAC  | GAGAG  | GAGTA  | GAGTT  | GAGTC  | GAGTG  | GAGCA  | GAGCT | GAGCC | GAGCG  | GAGGA  | GAGGT  | GAGGC  | GAGGG  |
| GTA  | GTAAA | GTAAT  | GTAAC  | GTAAG  | GTATA  | GTATT  | GTATC  | GTATG  | GTACA  | GTACT | GTACC | GTACG  | GTAGA  | GTAGT  | GTAGC  | GTAGG  |
| GTT  | GTTAA | GTTAT  | GTTAC  | GTTAG  | GTTTA  | GTTTT  | GTTTC  | GTTTG  | GTTCA  | GTTCT | GTTCC | GTTCG  | GTTGA  | GTTGT  | GTTGC  | GTTGG  |
| GTC  | GTCAA | GTCAAT | GTCAAC | GTCAAG | GTCTA  | GTCTT  | GTCTC  | GTCTG  | GTCCA  | GTCTT | GTCCC | GTCCG  | GTCGA  | GTCGT  | GTCGC  | GTCCG  |
| GTG  | GTGAA | GTGAT  | GTGAC  | GTGAG  | GTGTA  | GTGTT  | GTGTC  | GTGTG  | GTGCA  | GTGCT | GTGCC | GTGGG  | GTGGA  | GTGGT  | GTGGC  | GTGGG  |
| GCA  | GCAAA | GCAAT  | GCAAC  | GCAAG  | GCAATA | GCAATT | GCAATC | GCAATG | GCAACA | GCACT | GCAAC | GCAACG | GCAAGA | GCAAGT | GCAAGC | GCAAGG |
| GCT  | GCTAA | GCTAT  | GCTAC  | GCTAG  | GCTTA  | GCTTT  | GCTTC  | GCTTG  | GCTCA  | GCTCT | GCTCC | GCTCG  | GCTGA  | GCTGT  | GCTGC  | GCTGG  |
| GCC  | GCCAA | GCCAT  | GCCAC  | GCCAG  | GCCTA  | GCCTT  | GCCTC  | GCCTG  | GCCCA  | GCCCT | GCCCG | GCCCG  | GCCGA  | GCCGT  | GCCGC  | GCCGG  |
| GCG  | GCGAA | GCGAT  | GCGAC  | GCGAG  | GCGTA  | GCGTT  | GCGTC  | GCGTG  | GCGCA  | GCGCT | GCGCC | GCGCG  | GCGGA  | GCGGT  | GCGGC  | GCGGG  |
| GGA  | GGAAA | GGAAT  | GGAAC  | GGAAG  | GGATA  | GGATT  | GGATC  | GGATG  | GGACA  | GGACT | GGACC | GGACG  | GGAGA  | GGAGT  | GGAGC  | GGAGG  |
| GGT  | GGTAA | GGTAT  | GGTAC  | GGTAG  | GGTTA  | GGTTT  | GGTTC  | GGTTG  | GGTCA  | GGTCT | GGTCC | GGTCG  | GGTGA  | GGTGT  | GGTGC  | GGTGG  |
| GCG  | GGCAA | GGCAT  | GGCAC  | GGCAG  | GGCTA  | GGCTT  | GGCTC  | GGCTG  | GGCCA  | GGCGT | GGCCG | GGCCG  | GGCGA  | GGCGT  | GGCGC  | GGCGG  |
| GGG  | GGGAA | GGGAT  | GGGAC  | GGGAG  | GGGTA  | GGGTT  | GGGTC  | GGGTG  | GGGCA  | GGGCT | GGGCC | GGGGG  | GGGGA  | GGGGT  | GGGGC  | GGGGG  |

- A(22.55%)
- T(25.33%)
- C(25.65%)
- G(26.45%)
- N(0.000%)
- GC(52.11%)

### Before filtering: read2: quality

Value of each position will be shown on mouse over.

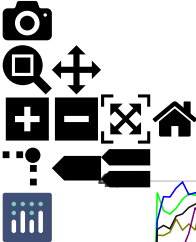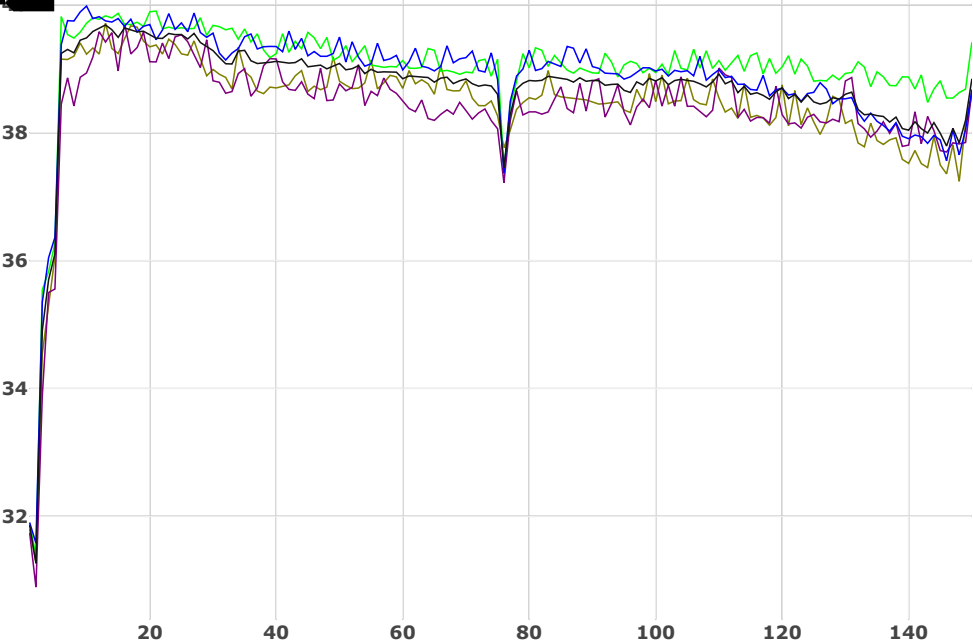

### Before filtering: read2: base contents

Value of each position will be shown on mouse over.

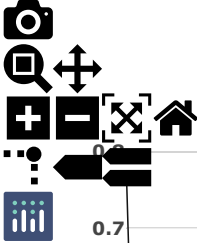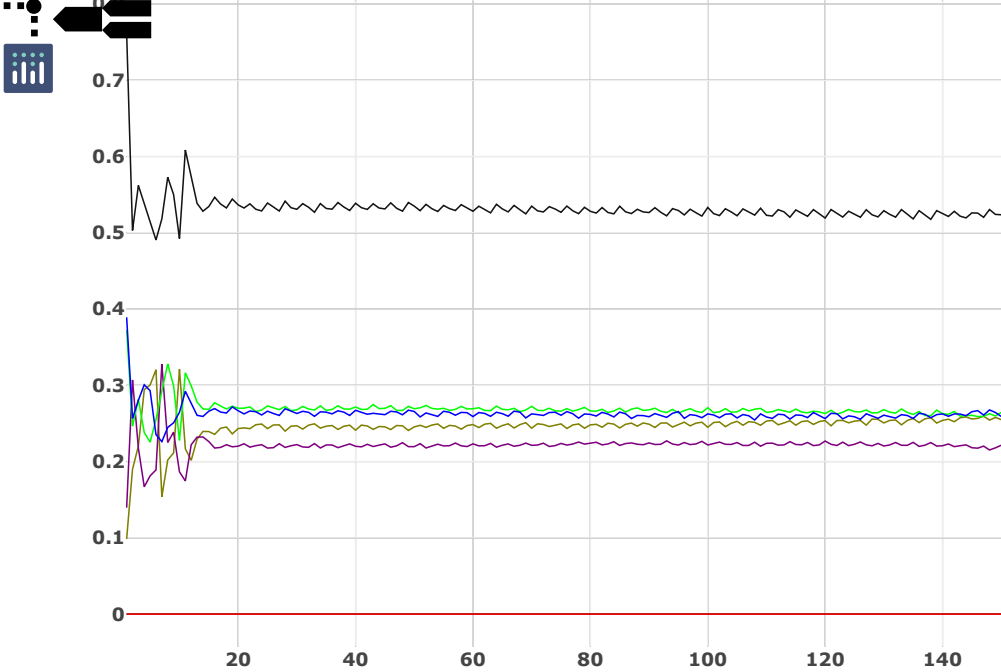

### Before filtering: read2: KMER counting

Darker background means larger counts. The count will be shown on mouse over.

|     | AA     | AT      | AC       | AG       | TA       | TT       | TC       | TG       | CA       | CT       | CC       | CG       | GA       | GT       | GC       | GG       |
|-----|--------|---------|----------|----------|----------|----------|----------|----------|----------|----------|----------|----------|----------|----------|----------|----------|
| AAA | AAAAA  | AAAAT   | AAAAC    | AAAAG    | AAATA    | AAATT    | AAATC    | AAATG    | AAACA    | AAACT    | AAACC    | AAACG    | AAAGA    | AAAGT    | AAAGC    | AAAGG    |
| AAT | AATAA  | AATAT   | AATAC    | AATAG    | AATTA    | AATTT    | AATTC    | AATTG    | AATCA    | AATCT    | AATCC    | AATCG    | AATGA    | AATGT    | AATGC    | AATGG    |
| AAC | AACAA  | AACAT   | AACAC    | AACAG    | AACTA    | AAC TT   | AAC TC   | AAC TG   | AACCA    | AACCT    | AACCC    | AACCG    | AACGA    | AACGT    | AACGC    | AACGG    |
| AAG | AAGAA  | AAGAT   | AAGAC    | AAGAG    | AAGTA    | AAGTT    | AAGTC    | AAGTG    | AAGCA    | AAGCT    | AAGCC    | AAGCG    | AAGGA    | AAGGT    | AAGGC    | AAGGG    |
| ATA | ATAAA  | ATAAT   | ATAAC    | ATAAG    | ATATA    | ATA TT   | ATA TC   | ATA TG   | ATACA    | ATACT    | ATACC    | ATACG    | ATAGA    | ATAGT    | ATAGC    | ATAGG    |
| ATT | ATTAA  | ATTAT   | ATTAC    | ATTAG    | ATTTA    | ATTTT    | ATTTT    | ATTTG    | ATTCA    | ATTCT    | ATTCC    | ATTCT    | ATTGA    | ATTGT    | ATTGC    | ATTGG    |
| ATC | ATCAA  | ATCAT   | ATCAC    | ATCAG    | ATCTA    | ATCTT    | ATCTC    | ATCTG    | ATCCA    | ATCCT    | ATCCC    | ATCCG    | ATCGA    | ATCGT    | ATCGC    | ATCGG    |
| ATG | ATGAA  | ATGAT   | ATGAC    | ATGAG    | ATGTA    | ATGTT    | ATGTC    | ATGTG    | ATGCA    | ATGCT    | ATGCC    | ATGCG    | ATGGA    | ATGGT    | ATGGC    | ATGGG    |
| ACA | ACAAA  | ACAAT   | ACAAC    | ACAAG    | ACATA    | ACATT    | ACATC    | ACATG    | ACACA    | ACACT    | ACACC    | ACACG    | ACAGA    | ACAGT    | ACAGC    | ACAGG    |
| ACT | ACTAA  | ACTAT   | ACTAC    | ACTAG    | ACTTA    | ACTTT    | ACTTC    | ACTTG    | ACTCA    | ACTCT    | ACTCC    | ACTCG    | ACTGA    | ACTGT    | ACTGC    | ACTGG    |
| ACC | ACCAA  | ACCAT   | ACCAC    | ACCAG    | ACCTA    | ACCTT    | ACCTC    | ACCTG    | ACCCA    | AC CCT   | ACCCC    | ACCCG    | ACCGA    | ACCGT    | ACCGC    | ACCGG    |
| ACG | ACGAA  | ACGAT   | ACGAC    | ACGAG    | ACGTA    | ACGTT    | ACGTC    | ACGTG    | ACGCA    | ACGCT    | ACGCC    | ACGCG    | ACGGA    | ACGGT    | ACGGC    | ACGGG    |
| AGA | AGAAA  | AGAAT   | AGAAC    | AGAAG    | AGATA    | AGATT    | AGATC    | AGATG    | AGACA    | AGACT    | AGACC    | AGACG    | AGAGA    | AGAGT    | AGAGC    | AGAGG    |
| AGT | AGTAA  | AGTAT   | AGTAC    | AGTAG    | AGTTA    | AGTTT    | AGTTC    | AGTTG    | AGTCA    | AGTCT    | AGTCC    | AGTCG    | AGTGA    | AGTGT    | AGTGC    | AGTGG    |
| AGC | AGCAA  | AGCAT   | AGCAC    | AGCAG    | AGCTA    | AGCTT    | AGCTC    | AGCTG    | AGCCA    | AGCCT    | AGCCC    | AGCCG    | AGCGA    | AGCGT    | AGCGC    | AGCGG    |
| AGG | AGGAA  | AGGAT   | AGGAC    | AGGAG    | AGGTA    | AGGTT    | AGGTC    | AGGTG    | AGGCA    | AGGCT    | AGGCC    | AGGCG    | AGGGA    | AGGGT    | AGGGC    | AGGGG    |
| TAA | TAAAA  | TAAAT   | TAAAC    | TAAAG    | TAA TA   | TAA TT   | TAA TC   | TAA TG   | TAA CA   | TAA CT   | TAA CC   | TAA CG   | TAA GA   | TAA GT   | TAA GC   | TAA GG   |
| TAT | TATAA  | TATAT   | TATAC    | TATAG    | TATTA    | TATTT    | TATTC    | TATTG    | TATCA    | TATCT    | TATCC    | TATCG    | TATGA    | TATGT    | TATGC    | TATGG    |
| TAC | TACAA  | TACAT   | TACAC    | TACAG    | TACTA    | TACTT    | TACTC    | TACTG    | TACCA    | TACCT    | TACCC    | TACCG    | TACGA    | TACGT    | TACGC    | TACGG    |
| TAG | TAGAA  | TAGAT   | TAGAC    | TAGAG    | TAGTA    | TAGTT    | TAGTC    | TAGTG    | TAGCA    | TAGCT    | TAGCC    | TAGCG    | TAGGA    | TAGGT    | TAGGC    | TAGGG    |
| TTA | TTAAA  | TTAAT   | TTAAC    | TTAAG    | TTATA    | TTATT    | TTATC    | TTATG    | TTACA    | TTACT    | TTACC    | TTACG    | TTAGA    | TTAGT    | TTAGC    | TTAGG    |
| TTT | TTAAA  | TTTAT   | TTTAC    | TTTAG    | TTTTA    | TTTTT    | TTTTT    | TTTTG    | TTTCA    | TTTCT    | TTTCC    | TTTCG    | TTTGA    | TTTGT    | TTTGC    | TTTGG    |
| TTC | TTCAA  | TTCAT   | TTCAC    | TTCAG    | TTCTA    | TTCTT    | TTCTC    | TTCTG    | TTCCA    | TT CCT   | TTCCC    | TTCCG    | TTCGA    | TTCGT    | TTCGC    | TTCCG    |
| TTG | TTGAA  | TTGAT   | TTGAC    | TTGAG    | TTGTA    | TTGTT    | TTGTC    | TTGTG    | TTGCA    | TTGCT    | TTGCC    | TTGCG    | TTGGA    | TTGGT    | TTGGC    | TTGGG    |
| TCA | TCAAA  | TCAAT   | TCAC     | TCAG     | TCATA    | TCATT    | TCATC    | TCATG    | TCACA    | TCACT    | TCACC    | TCACG    | TCAGA    | TCAGT    | TCAGC    | TCAGG    |
| TCT | TCTAA  | TCTAT   | TCTAC    | TCTAG    | TCTTA    | TCTTT    | TCTTC    | TCTTG    | TCTCA    | TCTCT    | TCTCC    | TCTCG    | TCTGA    | TCTGT    | TCTGC    | TCTGG    |
| TCC | TCCAA  | TCCAT   | TCCAC    | TCCAG    | TCCTA    | TCC TT   | TCC TC   | TCC TG   | TCC CA   | TCC CT   | TCC CC   | TCC CG   | TCC GA   | TCC GT   | TCC GC   | TCC GG   |
| TCG | TCGAA  | TCGAT   | TCGAC    | TCGAG    | TCGTA    | TCGTT    | TCGTC    | TCGTG    | TCGCA    | TCGCT    | TCGCC    | TCGCG    | TCGGA    | TCGGT    | TCGGC    | TCGGG    |
| TGA | TGAAA  | TGAAT   | TGAAC    | TGAAG    | TGATA    | TGATT    | TGATC    | TGATG    | TGACA    | TGACT    | TGACC    | TGACG    | TGAGA    | TGAGT    | TGAGC    | TGAGG    |
| TGT | TGTAA  | TGTAT   | TGTAC    | TGTAG    | TGTTA    | TGT TT   | TGT TC   | TGT TG   | TGT CA   | TGT CT   | TGT CC   | TGT CG   | TGT GA   | TGT GT   | TGT GC   | TGT GG   |
| TGC | TGCAA  | TGCAT   | TGCAC    | TGCAG    | TGCTA    | TGCTT    | TGCTC    | TGCTG    | TGCCA    | TG CCT   | TGCCC    | TGCCG    | TGCCA    | TGCGT    | TGCGC    | TGCGG    |
| TGA | TGAAA  | TGAT    | TGAC     | TGAG     | TGATA    | TGATT    | TGATC    | TGATG    | TGACA    | TGACT    | TGACC    | TGACG    | TGAGA    | TGAGT    | TGAGC    | TGAGG    |
| TGG | TGGAA  | TGGAT   | TGGAC    | TGGAG    | TGGTA    | TGGTT    | TGGTC    | TGGTG    | TGGCA    | TGGCT    | TGGCC    | TGGCG    | TGGGA    | TGGGT    | TGGGC    | TGGGG    |
| CAA | CAAAA  | CA AAT  | CA A AC  | CA A AG  | CA A TA  | CA A TT  | CA A TC  | CA A TG  | CA A CA  | CA A CT  | CA A CC  | CA A CG  | CA A GA  | CA A GT  | CA A GC  | CA A GG  |
| CAT | CATAA  | CATAT   | CATAC    | CATAG    | CATTA    | CATTT    | CATTC    | CATTG    | CATCA    | CATCT    | CATCC    | CATCG    | CATGA    | CATGT    | CATGC    | CATGG    |
| CAC | CACAA  | CACAT   | CACAC    | CACAG    | CAC TA   | CAC TT   | CAC TC   | CAC TG   | CAC CA   | CAC CT   | CAC CC   | CAC CG   | CAC GA   | CAC GT   | CAC GC   | CAC GG   |
| CAG | CAGAA  | CAGAT   | CAGAC    | CAGAG    | CAG TA   | CAG TT   | CAG TC   | CAG TG   | CAG CA   | CAG CT   | CAG CC   | CAG CG   | CAG GA   | CAG GT   | CAG GC   | CAG GG   |
| CTA | CTAAA  | CT AAT  | CT A AC  | CT A AG  | CT A TA  | CT A TT  | CT A TC  | CT A TG  | CT A CA  | CT A CT  | CT A CC  | CT A CG  | CT A GA  | CT A GT  | CT A GC  | CT A GG  |
| CTT | CTTAA  | CTTAT   | CTTAC    | CTTAG    | CTTTA    | CTTTT    | CTTTC    | CTTTG    | CTTCA    | CTTCT    | CTTCC    | CTTCG    | CTTGA    | CTTGT    | CTTGC    | CTTGG    |
| CTC | CTCAA  | CTCAT   | CTCAC    | CTCAG    | CTCTA    | CTCTT    | CTCTC    | CTCTG    | CTCCA    | CT CCT   | CTCCC    | CTCCG    | CTCGA    | CTCGT    | CTCGC    | CTCCG    |
| CTG | CTGAA  | CTGAT   | CTGAC    | CTGAG    | CTGTA    | CTGTT    | CTGTC    | CTGTG    | CTGCA    | CTGCT    | CTGCC    | CTGCG    | CTGGA    | CTGGT    | CTGGC    | CTGGG    |
| CCA | CCAAA  | CC AAT  | CC A AC  | CC A AG  | CC A TA  | CC A TT  | CC A TC  | CC A TG  | CC A CA  | CC A CT  | CC A CC  | CC A CG  | CC A GA  | CC A GT  | CC A GC  | CC A GG  |
| CCT | CCTAA  | CCTAT   | CCTAC    | CCTAG    | CCTTA    | CCTTT    | CCTTC    | CCTTG    | CCTCA    | CCTCT    | CCTCC    | CCTCG    | CCTGA    | CCTGT    | CCTGC    | CCTGG    |
| CCC | CCCAA  | CCCAT   | CCCAC    | CCCAG    | CCCTA    | CCCTT    | CCCTC    | CCCTG    | CCCCA    | CC CCT   | CCCCC    | CCCCG    | CCCGA    | CCCGT    | CCCGC    | CCCGG    |
| CCG | CCGAA  | CCGAT   | CCGAC    | CCGAG    | CCGTA    | CCGTT    | CCGTC    | CCGTG    | CCGCA    | CCGCT    | CCGCC    | CCGCG    | CCGGA    | CCGGT    | CCGGC    | CCGGG    |
| CGA | CGAAA  | CG AAT  | CG A AC  | CG A AG  | CG A TA  | CG A TT  | CG A TC  | CG A TG  | CG A CA  | CG A CT  | CG A CC  | CG A CG  | CG A GA  | CG A GT  | CG A GC  | CG A GG  |
| CGT | CGTAA  | CGTAT   | CGTAC    | CGTAG    | CGTTA    | CGTTT    | CGTTC    | CGTTG    | CGTCA    | CGTCT    | CGTCC    | CGTCG    | CGTGA    | CGTGT    | CGTGC    | CGTGG    |
| CGC | CGCAA  | CGCAT   | CGCAC    | CGCAG    | CGCTA    | CGCTT    | CGCTC    | CGCTG    | CGCCA    | CG CCT   | CGCCC    | CGCCG    | CGCGA    | CGCGT    | CGCGC    | CGCCG    |
| CGG | CGGAA  | CGGAT   | CGGAC    | CGGAG    | CGGTA    | CGGTT    | CGGTC    | CGGTG    | CGGCA    | CGGCT    | CGGCC    | CGGCG    | CGGGA    | CGGGT    | CGGGC    | CGGGG    |
| GAA | GAAAA  | G A AAT | G A A AC | G A A AG | G A A TA | G A A TT | G A A TC | G A A TG | G A A CA | G A A CT | G A A CC | G A A CG | G A A GA | G A A GT | G A A GC | G A A GG |
| GAT | GATAA  | GATAT   | GATAC    | GATAG    | GATTA    | GATTT    | GATTC    | GATTG    | GATCA    | GATCT    | GATCC    | GATCG    | GATGA    | GATGT    | GATGC    | GATGG    |
| GAC | GACAA  | GACAT   | GACAC    | GACAG    | GACTA    | GACTT    | GACTC    | GACTG    | GACCA    | GACCT    | GACCC    | GACCG    | GACGA    | GACGT    | GACGC    | GACGG    |
| GAG | GAGAA  | GAGAT   | GAGAC    | GAGAG    | GAGTA    | GAGTT    | GAGTC    | GAGTG    | GAGCA    | GAGCT    | GAGCC    | GAGCG    | GAGGA    | GAGGT    | GAGGC    | GAGGG    |
| GTA | GTA AA | GTA AT  | GTA AC   | GTA AG   | GTA TA   | GTA TT   | GTA TC   | GTA TG   | GTA CA   | GTA CT   | GTA CC   | GTA CG   | GTA GA   | GTA GT   | GTA GC   | GTA GG   |
| GTT | GTTAA  | GTTAT   | GTTAC    | GTTAG    | GTTTA    | GTTTT    | GTTTC    | GTTTG    | GTTCA    | GTTCT    | GTTCC    | GTTCG    | GTTGA    | GTTGT    | GTTGC    | GTTGG    |
| GTC | GTC AA | GTC AT  | GTC AC   | GTC AG   | GTC TA   | GTC TT   | GTC TC   | GTC TG   | GTC CA   | GTC CT   | GTC CC   | GTC CG   | GTC GA   | GTC GT   | GTC GC   | GTC GG   |
| GTG | GTCAA  | GTGAT   | GTGAC    | GTGAG    | GTGTA    | GTGTT    | GTGTC    | GTGTG    | GTGCA    | GTGCT    | GTGCC    | GTGCG    | GTGGA    | GTGGT    | GTGGC    | GTGGG    |
| GCA | GCAAA  | GCAAT   | GCAAC    | GCAAG    | GCA TA   | GCA TT   | GCA TC   | GCA TG   | GCA CA   | GCA CT   | GCA CC   | GCA CG   | GCA GA   | GCA GT   | GCA GC   | GCA GG   |
| GCT | GCTAA  | GCTAT   | GCTAC    | GCTAG    | GCTTA    | GCTTT    | GCTTC    | GCTTG    | GCTCA    | GCTCT    | GCTCC    | GCTCG    | GCTGA    | GCTGT    | GCTGC    | GCTGG    |
| GCC | GCCAA  | GCCAT   | GCCAC    | GCCAG    | GCC TA   | GCC TT   | GCC TC   | GCC TG   | GCC CA   | GCC CT   | GCC CC   | GCC CG   | GCC GA   | GCC GT   | GCC GC   | GCC GG   |
| GCG | GCGAA  | GCGAT   | GCGAC    | GCGAG    | GCGTA    | GCGTT    | GCGTC    | GCGTG    | GCGCA    | GCGCT    | GCGCC    | GCGCG    | GCGGA    | GCGGT    | GCGGC    | GCGGG    |
| GGA | GGAAA  | GG AAT  | GG A AC  | GG A AG  | GG A TA  | GG A TT  | GG A TC  | GG A TG  | GG A CA  | GG A CT  | GG A CC  | GG A CG  | GG A GA  | GG A GT  | GG A GC  | GG A GG  |
| GGT | GGTAA  | GGTAT   | GGTAC    | GGTAG    | GGTTA    | GGTTT    | GGTTC    | GGTTG    | GGTCA    | GGTCT    | GGTCC    | GGTCG    | GGTGA    | GGTGT    | GGTGC    | GGTGG    |
| GGC | GGCAA  | GGCAT   | GGCAC    | GGCAG    | GGCTA    | GGCTT    | GGCTC    | GGCTG    | GGCCA    | GG CCT   | GGCCC    | GGCCG    | GGCGA    | GGCGT    | GGCGC    | GGCCG    |
| GGG | GGGAA  | GGGAT   | GGGAC    | GGGAG    | GGGTA    | GGGTT    | GGGTC    | GGGTG    | GGGCA    | GGGCT    | GGGCC    | GGGCG    | GGGGA    | GGGGT    | GGGGC    | GGGGG    |

- A(24.67%)
- T(22.14%)
- C(26.87%)
- G(26.31%)
- N(0.001%)
- GC(53.18%)

### After filtering

After filtering: read1: quality

Value of each position will be shown on mouse over.

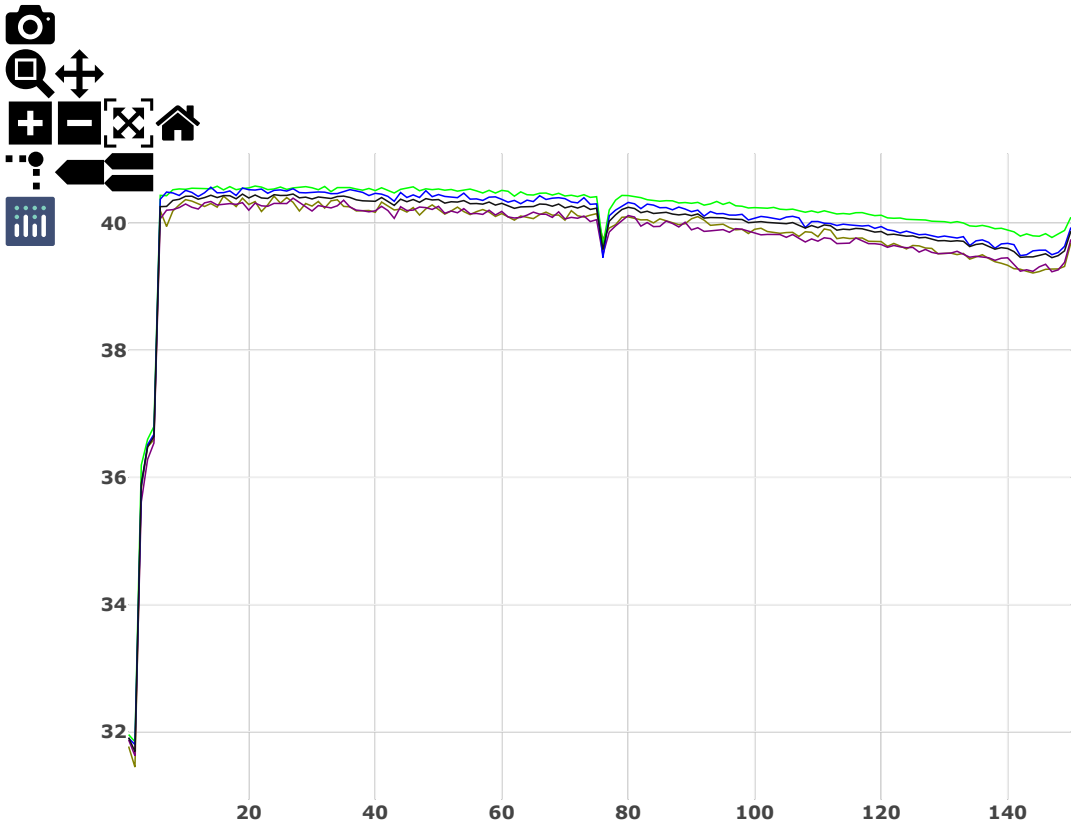

After filtering: read1: base contents

Value of each position will be shown on mouse over.

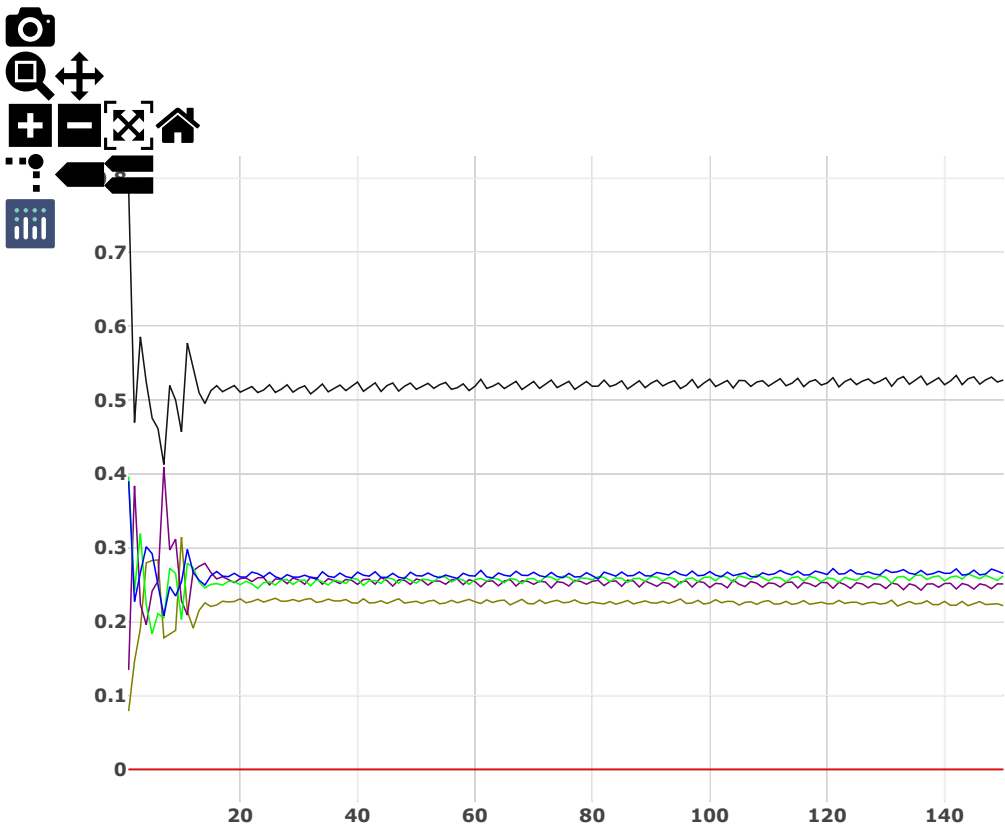

After filtering: read1: KMER counting

Darker background means larger counts. The count will be shown on mouse over.

|     | AA    | AT    | AC    | AG    | TA    | TT     | TC     | TG     | CA    | CT    | CC    | CG    | GA    | GT    | GC    | GG    |
|-----|-------|-------|-------|-------|-------|--------|--------|--------|-------|-------|-------|-------|-------|-------|-------|-------|
| AAA | AAAAA | AAAAT | AAAAC | AAAAG | AAATA | AAATT  | AAATC  | AAATG  | AAACA | AAACT | AAACC | AAACG | AAAGA | AAAGT | AAAGC | AAAGG |
| AAT | AATAA | AATAT | AATAC | AATAG | AATTA | AATTT  | AATTC  | AATTG  | AATCA | AATCT | AATCC | AATCG | AATGA | AATGT | AATGC | AATGG |
| AAC | AACAA | AACAT | AACAC | AACAG | AACTA | AAC TT | AAC TC | AAC TG | AACCA | AACCT | AACCC | AACCG | AACGA | AACGT | AACGC | AACGG |
| AAG | AAGAA | AAGAT | AAGAC | AAGAG | AAGTA | AAGTT  | AAGTC  | AAGTG  | AAGCA | AAGCT | AAGCC | AAGCG | AAGGA | AAGGT | AAGGC | AAGGG |
| ATA | ATAAA | ATAAT | ATAAC | ATAAG | ATATA | ATATT  | ATATC  | ATATG  | ATACA | ATACT | ATACC | ATACG | ATAGA | ATAGT | ATAGC | ATAGG |
| ATT | ATTAA | ATTAT | ATTAC | ATTAG | ATTTA | ATTTT  | ATTTC  | ATTTG  | ATTCA | ATTCT | ATTCC | ATTCG | ATTGA | ATTGT | ATTGC | ATTGG |

|     |        |        |        |        |        |         |         |         |         |         |         |         |         |         |         |         |
|-----|--------|--------|--------|--------|--------|---------|---------|---------|---------|---------|---------|---------|---------|---------|---------|---------|
| ATC | ATCAA  | ATCAT  | ATCAC  | ATCAG  | ATCTA  | ATCTT   | ATCTC   | ATCTG   | ATCCA   | ATCCT   | ATCCC   | ATCCG   | ATCGA   | ATCGT   | ATCGC   | ATCGG   |
| ATG | ATGAA  | ATGAT  | ATGAC  | ATGAG  | ATGTA  | ATGTT   | ATGTC   | ATGTG   | ATGCA   | ATGCT   | ATGCC   | ATGCG   | ATGGA   | ATGGT   | ATGGC   | ATGGG   |
| ACA | ACAAA  | ACAAT  | ACAAC  | ACAAG  | ACATA  | ACATT   | ACATC   | ACATG   | ACACA   | ACACT   | ACACC   | ACACG   | ACAGA   | ACAGT   | ACAGC   | ACAGG   |
| ACT | ACTAA  | ACTAT  | ACTAC  | ACTAG  | ACTTA  | ACTTT   | ACTTC   | ACTTG   | ACTCA   | ACTCT   | ACTCC   | ACTCG   | ACTGA   | ACTGT   | ACTGC   | ACTGG   |
| ACC | ACCAA  | ACCAT  | ACCAC  | ACCAG  | ACCTA  | ACCTT   | ACCTC   | ACCTG   | ACCCA   | ACCCT   | ACCCC   | ACCCG   | ACCGA   | ACCGT   | ACCGC   | ACCGG   |
| ACG | ACGAA  | ACGAT  | ACGAC  | ACGAG  | ACGTA  | ACGTT   | ACGTC   | ACGTG   | ACGCA   | ACGCT   | ACGCC   | ACGCG   | ACGGA   | ACGGT   | ACGGC   | ACGGG   |
| AGA | AGAAA  | AGAAT  | AGAAC  | AGAAG  | AGATA  | AGATT   | AGATC   | AGATG   | AGACA   | AGACT   | AGACC   | AGACG   | AGAGA   | AGAGT   | AGAGC   | AGAGG   |
| AGT | AGTAA  | AGTAT  | AGTAC  | AGTAG  | AGTTA  | AGTTT   | AGTTC   | AGTTG   | AGTCA   | AGTCT   | AGTCC   | AGTCG   | AGTGA   | AGGT    | AGTGC   | AGTGG   |
| AGC | AGCAA  | AGCAT  | AGCAC  | AGCAG  | AGCTA  | AGCTT   | AGCTC   | AGCTG   | AGCCA   | AGCCT   | AGCCC   | AGCCG   | AGCGA   | AGCGT   | AGCGC   | AGCGG   |
| AGG | AGGAA  | AGGAT  | AGGAC  | AGGAG  | AGGTA  | AGGTT   | AGGTC   | AGGTG   | AGGCA   | AGGCT   | AGGCC   | AGGCG   | AGGGA   | AGGGT   | AGGGC   | AGGGG   |
| TAA | TAAAA  | TAAAT  | TAAAC  | TAAAG  | TAAATA | TAAATT  | TAAATC  | TAAATG  | TAAACA  | TAAACT  | TAAACC  | TAAACG  | TAAAGA  | TAAAGT  | TAAAGC  | TAAAGG  |
| TAT | TATAA  | TATAT  | TATAC  | TATAG  | TATTA  | TATTT   | TATTC   | TATTG   | TATCA   | TATCT   | TATCC   | TATCG   | TATGA   | TATGT   | TATGC   | TATGG   |
| TAC | TACAA  | TACAT  | TACAC  | TACAG  | TACTA  | TACTT   | TACTC   | TACTG   | TACCA   | TACCT   | TACCC   | TACCG   | TACGA   | TACGT   | TACGC   | TACGG   |
| TAG | TAGAA  | TAGAT  | TAGAC  | TAGAG  | TAGTA  | TAGTT   | TAGTC   | TAGTG   | TAGCA   | TAGCT   | TAGCC   | TAGCG   | TAGGA   | TAGGT   | TAGGC   | TAGGG   |
| TTA | TTAAA  | TTAAT  | TTAAC  | TTAAG  | TTATA  | TTATT   | TTATC   | TTATG   | TTACA   | TTACT   | TTACC   | TTACG   | TTAGA   | TTAGT   | TTAGC   | TTAGG   |
| TTT | TTTAA  | TTTAT  | TTTAC  | TTTAG  | TTTTA  | TTTTT   | TTTTC   | TTTTG   | TTTCA   | TTTCT   | TTTCC   | TTTCG   | TTTGA   | TTTGT   | TTTGC   | TTTGG   |
| TTC | TTCAA  | TTCAT  | TTCAC  | TTCAG  | TTCTA  | TTCTT   | TTCTC   | TTCTG   | TTCCA   | TTCCT   | TTCCC   | TTCCG   | TTCGA   | TTCGT   | TTCGC   | TTCCG   |
| TTG | TTGAA  | TTGAT  | TTGAC  | TTGAG  | TTGTA  | TTGTT   | TTGTC   | TTGTG   | TTGCA   | TTGCT   | TTGCC   | TTGCG   | TTGGA   | TTGGT   | TTGGC   | TTGGG   |
| TCA | TCAAA  | TCAAT  | TCAAC  | TCAG   | TCATA  | TCATT   | TCATC   | TCATG   | TCACA   | TCACT   | TCACC   | TCACG   | TCAGA   | TCAGT   | TCAGC   | TCAGG   |
| TCT | TCTAA  | TCTAT  | TCTAC  | TCTAG  | TCTTA  | TCTTT   | TCTTC   | TCTTG   | TCTCA   | TCTCT   | TCTCC   | TCTCG   | TCTGA   | TCTGT   | TCTGC   | TCTGG   |
| TCC | TCCAA  | TCCAT  | TCCAC  | TCCAG  | TCCTA  | TCCTT   | TCCTC   | TCCTG   | TCCCA   | TCCCT   | TCCCC   | TCCCG   | TCCGA   | TCCGT   | TCCGC   | TCCGG   |
| TCG | TCGAA  | TCGAT  | TCGAC  | TCGAG  | TCGTA  | TCGTT   | TCGTC   | TCGTG   | TCGCA   | TCGCT   | TCGCC   | TCGCG   | TCGGA   | TCGGT   | TCGGC   | TCGGG   |
| TGA | TGAAA  | TGAAT  | TGAAC  | TGAAG  | TGATA  | TGATT   | TGATC   | TGATG   | TGACA   | TGACT   | TGACC   | TGACG   | TGAGA   | TGAGT   | TGAGC   | TGAGG   |
| TGT | TGTAA  | TGTAT  | TGTAC  | TGTAG  | TGTTA  | TGTTT   | TGTTC   | TGTTG   | TGTCA   | TGTCT   | TGTCC   | TGTCG   | TGTGA   | TGTGT   | TGTGC   | TGTGG   |
| TGC | TGCAA  | TGCAT  | TGCAC  | TGCAG  | TGCTA  | TGCTT   | TGCTC   | TGCTG   | TGCCA   | TGCTT   | TGCCC   | TGCCG   | TGCCA   | TGCGT   | TGCGC   | TGCGG   |
| TGG | TGAAA  | TGGAT  | TGGAC  | TGGAG  | TGGTA  | TGGTT   | TGGTC   | TGGTG   | TGGCA   | TGGCT   | TGGCC   | TGGCG   | TGGGA   | TGGGT   | TGGGC   | TGGGG   |
| CAA | CAAAA  | CAAAAT | CAAAC  | CAAG   | CAATA  | CAATT   | CAATC   | CAATG   | CAACA   | CAACT   | CAACC   | CAACG   | CAAGA   | CAAGT   | CAAGC   | CAAGG   |
| CAT | CATAA  | CATAT  | CATAC  | CATAG  | CATTA  | CATTT   | CATTC   | CATTG   | CATCA   | CATCT   | CATCC   | CATCG   | CATGA   | CATGT   | CATGC   | CATGG   |
| CAC | CACAA  | CACAT  | CACAC  | CACAG  | CACCTA | CACCTT  | CACCTC  | CACCTG  | CACCA   | CACCT   | CACCC   | CACCG   | CACGA   | CACGT   | CACGC   | CACGG   |
| CAG | CAGAA  | CAGAT  | CAGAC  | CAGAG  | CAGTA  | CAGTT   | CAGTC   | CAGTG   | CAGCA   | CAGCT   | CAGCC   | CAGCG   | CAGGA   | CAGGT   | CAGGC   | CAGGG   |
| CTA | CTAAA  | CTAAT  | CTAAC  | CTAAG  | CTATA  | CTATT   | CTATC   | CTATG   | CTACA   | CTACT   | CTACC   | CTACG   | CTAGA   | CTAGT   | CTAGC   | CTAGG   |
| CTT | CTTAA  | CTTAT  | CTTAC  | CTTAG  | CTTTA  | CTTTT   | CTTTC   | CTTTG   | CTTCA   | CTTCT   | CTTCC   | CTTCG   | CTTGA   | CTTGT   | CTTGC   | CTTGG   |
| CTC | CTCAA  | CTCAT  | CTCAC  | CTCAG  | CTCTA  | CTCTT   | CTCTC   | CTCTG   | CTCCA   | CTCCT   | CTCCC   | CTCCG   | CTCGA   | CTCGT   | CTCGC   | CTCCG   |
| CTG | CTGAA  | CTGAT  | CTGAC  | CTGAG  | CTGTA  | CTGTT   | CTGTC   | CTGTG   | CTGCA   | CTGCT   | CTGCC   | CTGCG   | CTGGA   | CTGGT   | CTGGC   | CTGGG   |
| CCA | CCAAA  | CCAAAT | CCAAC  | CCAG   | CCATA  | CCATT   | CCATC   | CCATG   | CCACA   | CCACT   | CCACC   | CCACG   | CCAGA   | CCAGT   | CCAGC   | CCAGG   |
| CCT | CCTAA  | CCTAT  | CCTAC  | CCTAG  | CCTTA  | CCTTT   | CCTTC   | CCTTG   | CCTCA   | CCTCT   | CCTCC   | CCTCG   | CCTGA   | CCTGT   | CCTGC   | CCTGG   |
| CCC | CCCAA  | CCCAT  | CCCAC  | CCCAG  | CCCTA  | CCCTT   | CCCTC   | CCCTG   | CCCCA   | CCCCT   | CCCCC   | CCCCG   | CCCGA   | CCCGT   | CCCGC   | CCCCG   |
| CCG | CCGAA  | CCGAT  | CCGAC  | CCGAG  | CCGTA  | CCGTT   | CCGTC   | CCGTG   | CCGCA   | CCGCT   | CCGCC   | CCGCG   | CCGGA   | CCGGT   | CCGGC   | CCGGG   |
| CGA | CGAAA  | CGAAT  | CGAAC  | CGAG   | CGATA  | CGATT   | CGATC   | CGATG   | CGACA   | CGACT   | CGACC   | CGACG   | CGAGA   | CGAGT   | CGAGC   | CGAGG   |
| CGT | CGTAA  | CGTAT  | CGTAC  | CGTAG  | CGTTA  | CGTTT   | CGTTC   | CGTTG   | CGTCA   | CGCTT   | CGCCC   | CGCCG   | CGCGA   | CGCGT   | CGCGC   | CGCCG   |
| CGC | CGCAA  | CGCAT  | CGCAC  | CGCAG  | CGCTA  | CGCTT   | CGCTC   | CGCTG   | CGCCA   | CGCCT   | CGCCC   | CGCCG   | CGCGA   | CGCGT   | CGCGC   | CGCCG   |
| CGG | CGGAA  | CGGAT  | CGGAC  | CGGAG  | CGGTA  | CGGTT   | CGGTC   | CGGTG   | CGGCA   | CGGCT   | CGGCC   | CGGCG   | CGGGA   | CGGGT   | CGGGC   | CGGGG   |
| GAA | GA AAA | GA AAT | GA AAC | GA AG  | GA ATA | GA ATT  | GA ATC  | GA ATG  | GA ACA  | GA ACT  | GA ACC  | GA ACG  | GA AGA  | GA AGT  | GA AGC  | GA AGG  |
| GAT | GATAA  | GATAT  | GATAC  | GATAG  | GATTA  | GATTT   | GATTC   | GATTG   | GATCA   | GATCT   | GATCC   | GATCG   | GATGA   | GATGT   | GATGC   | GATGG   |
| GAC | GACAA  | GACAT  | GACAC  | GACAG  | GACTA  | GACTT   | GACTC   | GACTG   | GACCA   | GACCT   | GACCC   | GACCG   | GACGA   | GACGT   | GACGC   | GACGG   |
| GAG | GAGAA  | GAGAT  | GAGAC  | GAGAG  | GAGTA  | GAGTT   | GAGTC   | GAGTG   | GAGCA   | GAGCT   | GAGCC   | GAGCG   | GAGGA   | GAGGT   | GAGGC   | GAGGG   |
| GTA | GTA AA | GTA AT | GTA AC | GTA AG | GTA TA | GTA TT  | GTA TC  | GTA TG  | GTA CA  | GTA CT  | GTA CC  | GTA CG  | GTA GA  | GTA GT  | GTA GC  | GTA GG  |
| GTT | GTTAA  | GTTAT  | GTTAC  | GTTAG  | GTTTA  | GTTTT   | GTTTC   | GTTTG   | GTTCA   | GTTCT   | GTTCC   | GTTCG   | GTTGA   | GTTGT   | GTTGC   | GTTGG   |
| GTC | GTC AA | GTC AT | GTC AC | GTC AG | GTC TA | GTC TT  | GTC TC  | GTC TG  | GTC CA  | GTC CT  | GTC CC  | GTC CG  | GTC GA  | GTC GT  | GTC GC  | GTC GG  |
| GTG | GTGAA  | GTGAT  | GTGAC  | GTGAG  | GTGTA  | GTGTT   | GTGTC   | GTGTG   | GTGCA   | GTGCT   | GTGCC   | GTGCG   | GTGGA   | GTGGT   | GTGGC   | GTGGG   |
| GCA | GCAAA  | GCAAT  | GCAAC  | GCAAG  | GCAT A | GCA T T | GCA T C | GCA T G | GCA C A | GCA C T | GCA C C | GCA C G | GCA G A | GCA G T | GCA G C | GCA G G |
| GCT | GCTAA  | GCTAT  | GCTAC  | GCTAG  | GCTTA  | GCTTT   | GCTTC   | GCTTG   | GCTCA   | GCTCT   | GCTCC   | GCTCG   | GCTGA   | GCTGT   | GCTGC   | GCTGG   |
| GCC | GCCAA  | GCCAT  | GCCAC  | GCCAG  | GCCTA  | GCCTT   | GCCTC   | GCCTG   | GCCCA   | GCCCT   | GCCCC   | GCCCG   | GCCGA   | GCCGT   | GCCGC   | GCCGG   |
| GCG | GCGAA  | GCGAT  | GCGAC  | GCGAG  | GCGTA  | GCGTT   | GCGTC   | GCGTG   | GCGCA   | GCGCT   | GCGCC   | GCGCG   | GCGGA   | GCGGT   | GCGGC   | GCGGG   |
| GGA | GGA AA | GGA AT | GGA AC | GGA AG | GGA TA | GGA TT  | GGA TC  | GGA TG  | GGA CA  | GGA CT  | GGA CC  | GGA CG  | GGA GA  | GGA GT  | GGA GC  | GGA GG  |
| GGT | GGTAA  | GGTAT  | GGTAC  | GGTAG  | GGTTA  | GGTTT   | GGTTC   | GGTTG   | GGTCA   | GGTCT   | GGTCC   | GGTCG   | GGTGA   | GGTGT   | GGTGC   | GGTGG   |
| GGC | GGCAA  | GGCAT  | GGCAC  | GGCAG  | GGCTA  | GGCTT   | GGCTC   | GGCTG   | GGCCA   | GGCCT   | GGCCC   | GGCCG   | GGCGA   | GGCGT   | GGCGC   | GGCCG   |
| GGG | GGGAA  | GGGAT  | GGGAC  | GGGAG  | GGGTA  | GGGTT   | GGGTC   | GGGTG   | GGGCA   | GGGCT   | GGGCC   | GGGCG   | GGGGA   | GGGGT   | GGGGC   | GGGGG   |

A(22.50%)  
T(25.37%)  
C(25.68%)  
G(26.43%)  
N(0.000%)  
GC(52.11%)

## After filtering: read2: quality

Value of each position will be shown on mouse over.

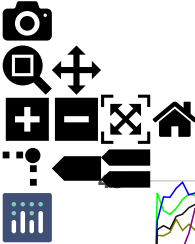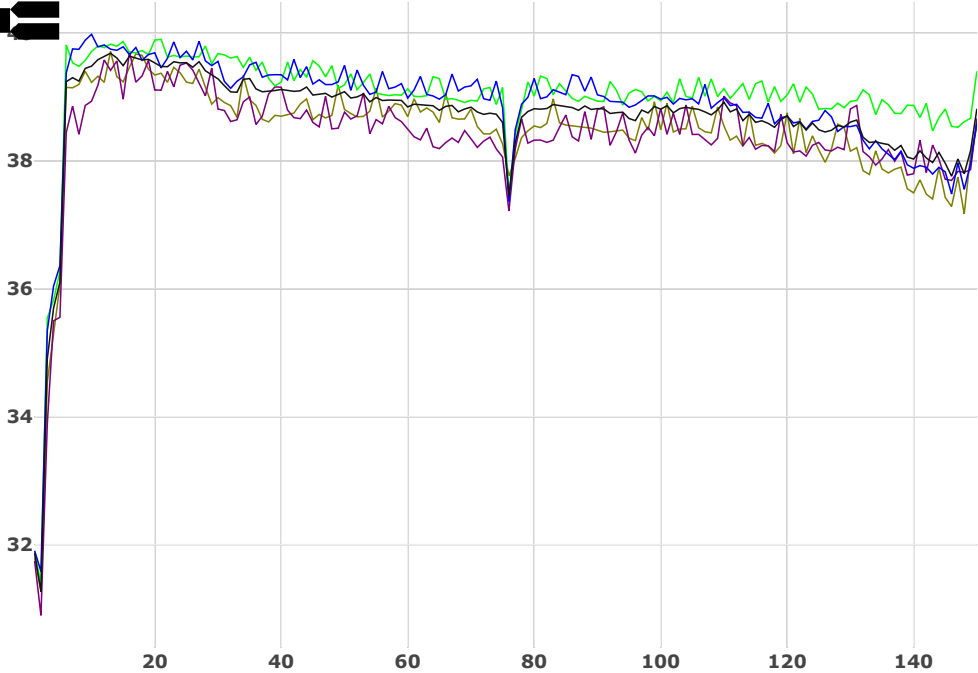

## After filtering: read2: base contents

Value of each position will be shown on mouse over.

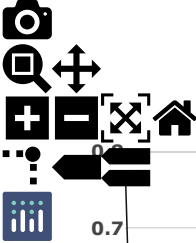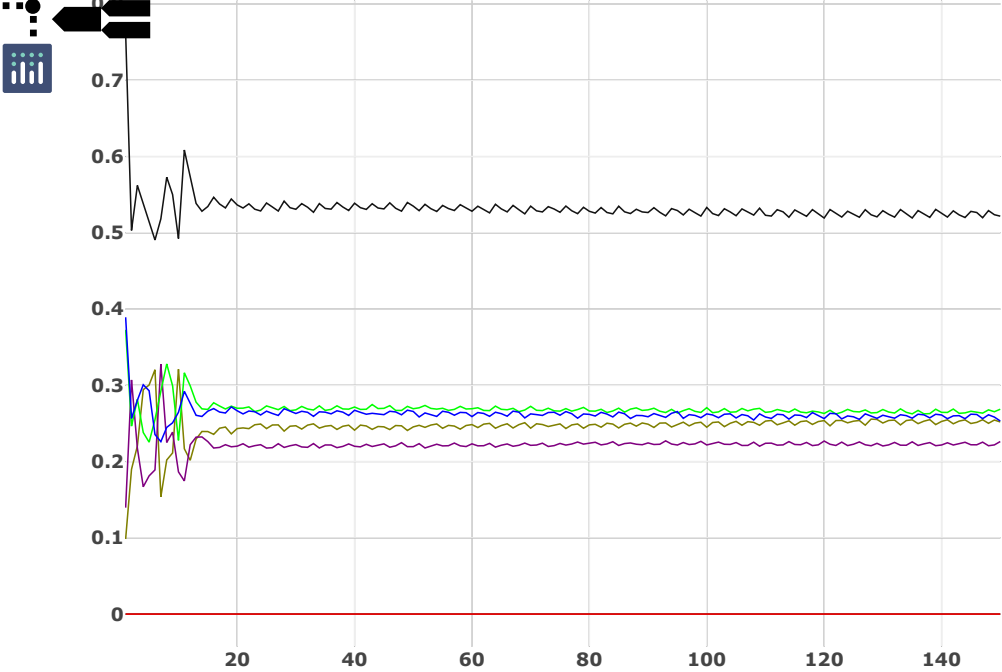

After filtering: read2: KMER counting

Darker background means larger counts. The count will be shown on mouse over.

|     | AA     | AT      | AC       | AG       | TA       | TT       | TC       | TG       | CA       | CT       | CC       | CG       | GA       | GT       | GC       | GG       |
|-----|--------|---------|----------|----------|----------|----------|----------|----------|----------|----------|----------|----------|----------|----------|----------|----------|
| AAA | AAAA   | AAAT    | AAAAC    | AAAAG    | AAATA    | AAATT    | AAATC    | AAATG    | AAACA    | AAACT    | AAACC    | AAACG    | AAAGA    | AAAGT    | AAAGC    | AAAGG    |
| AAT | AATAA  | AATAT   | AATAC    | AATAG    | AATTA    | AATTT    | AATTC    | AATTG    | AATCA    | AATCT    | AATCC    | AATCG    | AATGA    | AATGT    | AATGC    | AATGG    |
| AAC | AACAA  | AACAT   | AACAC    | AACAG    | AACTA    | AACTT    | AACTC    | AAC TG   | AACCA    | AACCT    | AACCC    | AACCG    | AACGA    | AACGT    | AACGC    | AACGG    |
| AAG | AAGAA  | AAGAT   | AAGAC    | AAGAG    | AAGTA    | AAGTT    | AAGTC    | AAGTG    | AAGCA    | AAGCT    | AAGCC    | AAGCG    | AAGGA    | AAGGT    | AAGGC    | AAGGG    |
| ATA | ATAAA  | ATAAT   | ATAAC    | ATAAG    | ATATA    | ATA TT   | ATATC    | ATATG    | ATACA    | ATACT    | ATACC    | ATACG    | ATAGA    | ATAGT    | ATAGC    | ATAGG    |
| ATT | ATTAA  | ATTAT   | ATTAC    | ATTAG    | ATTTA    | ATTTT    | ATTT C   | ATTTG    | ATTCA    | ATTCT    | ATTC C   | ATTCG    | ATTGA    | ATTGT    | ATTGC    | ATTGG    |
| ATC | ATCAA  | ATCAT   | ATCAC    | ATCAG    | ATCTA    | ATCTT    | ATCTC    | ATCTG    | ATCCA    | ATCCT    | ATCCC    | ATCCG    | ATCGA    | ATCGT    | ATCGC    | ATCGG    |
| ATG | ATGAA  | ATGAT   | ATGAC    | ATGAG    | ATGTA    | ATGTT    | ATGTC    | ATGTG    | ATGCA    | ATGCT    | ATGCC    | ATGCG    | ATGGA    | ATGGT    | ATGGC    | ATGGG    |
| ACA | ACAAA  | ACAAT   | ACAAC    | ACAAG    | ACATA    | ACATT    | ACATC    | ACATG    | ACACA    | ACACT    | ACACC    | ACACG    | ACAGA    | ACAGT    | ACAGC    | ACAGG    |
| ACT | ACTAA  | ACTAT   | ACTAC    | ACTAG    | ACTTA    | ACTTT    | ACTTC    | ACTTG    | ACTCA    | ACTCT    | ACTCC    | ACTCG    | ACTGA    | ACTGT    | ACTGC    | ACTGG    |
| ACC | ACCAA  | ACCAT   | ACCAC    | ACCAG    | ACCTA    | ACCTT    | ACCTC    | ACCTG    | ACCCA    | AC CCT   | ACCCC    | ACCCG    | ACCGA    | ACCGT    | ACCGC    | ACCGG    |
| ACG | ACGAA  | ACGAT   | ACGAC    | ACGAG    | ACGTA    | ACGTT    | ACGTC    | ACGTG    | ACGCA    | ACGCT    | ACGCC    | ACGCG    | ACGGA    | ACGGT    | ACGGC    | ACGGG    |
| AGA | AGAAA  | AGAAT   | AGAAC    | AGAAG    | AGATA    | AGATT    | AGATC    | AGATG    | AGACA    | AGACT    | AGACC    | AGACG    | AGAGA    | AGAGT    | AGAGC    | AGAGG    |
| AGT | AGTAA  | AGTAT   | AGTAC    | AGTAG    | AGTTA    | AGTTT    | AGTTC    | AGTTG    | AGTCA    | AGTCT    | AGTCC    | AGTCG    | AGTGA    | AGTGT    | AGTGC    | AGTGG    |
| AGC | AGCAA  | AGCAT   | AGCAC    | AGCAG    | AGCTA    | AGCTT    | AGCTC    | AGCTG    | AGCCA    | AGCCT    | AGCCC    | AGCCG    | AGCGA    | AGCGT    | AGCGC    | AGCGG    |
| AGG | AGGAA  | AGGAT   | AGGAC    | AGGAG    | AGGTA    | AGGTT    | AGGTC    | AGGTG    | AGGCA    | AGGCT    | AGGCC    | AGGCG    | AGGGA    | AGGGT    | AGGGC    | AGGGG    |
| TAA | TAAAA  | TAAAT   | TAAAC    | TAAAG    | TAA TA   | TAA TT   | TAA TC   | TAA TG   | TAA CA   | TAA CT   | TAA CC   | TAA CG   | TAA GA   | TAA GT   | TAA GC   | TAA GG   |
| TAT | TATAA  | TATAT   | TATAC    | TATAG    | TATTA    | TATTT    | TATTC    | TAT TG   | TAT CA   | TAT CT   | TAT CC   | TAT CG   | TAT GA   | TAT GT   | TAT GC   | TAT GG   |
| TAC | TACAA  | TACAT   | TACAC    | TACAG    | TACTA    | TACTT    | TACTC    | TACTG    | TACCA    | TACCT    | TACCC    | TACCG    | TACGA    | TACGT    | TACGC    | TACGG    |
| TAG | TAGAA  | TAGAT   | TAGAC    | TAGAG    | TAGTA    | TAGTT    | TAGTC    | TAGTG    | TAGCA    | TAGCT    | TAGCC    | TAGCG    | TAGGA    | TAGGT    | TAGGC    | TAGGG    |
| TTA | TTAAA  | TTAAT   | TTAAC    | TTAAG    | TTATA    | TTATT    | TTATC    | TTATG    | TTACA    | TTACT    | TTACC    | TTACG    | TTAGA    | TTAGT    | TTAGC    | TTAGG    |
| TTT | TTTAA  | TTTAT   | TTTAC    | TTTAG    | TTTTA    | TTTTT    | TTTT C   | TTTTG    | TTTCA    | TTTCT    | TTTCC    | TTTCG    | TTTGA    | TTTGT    | TTTGC    | TTTGG    |
| TTC | TTCAA  | TTCAT   | TTCAC    | TTCAG    | TTCTA    | TTCTT    | TTCTC    | TTCTG    | TTCCA    | TT CCT   | TTCCC    | TTCCG    | TTCGA    | TTCGT    | TTCGC    | TTCCG    |
| TTG | TTGAA  | TTGAT   | TTGAC    | TTGAG    | TTGTA    | TTGTT    | TTGTC    | TTGTG    | TTGCA    | TTGCT    | TTGCC    | TTGCG    | TTGGA    | TTGGT    | TTGGC    | TTGGG    |
| TCA | TCAAA  | TCAAT   | TCAC     | TCAG     | TCATA    | TCATT    | TCATC    | TCATG    | TCACA    | TCACT    | TCACC    | TCACG    | TCAGA    | TCAGT    | TCAGC    | TCAGG    |
| TCT | TCTAA  | TCTAT   | TCTAC    | TCTAG    | TCTTA    | TCTTT    | TCTTC    | TCTTG    | TCTCA    | TCTCT    | TCTCC    | TCTCG    | TCTGA    | TCTGT    | TCTGC    | TCTGG    |
| TCC | TCCAA  | TCCAT   | TCCAC    | TCCAG    | TCCTA    | TCCTT    | TCCTC    | TCCTG    | TCCCA    | TCCCT    | TCCCC    | TCCCG    | TCCGA    | TCCGT    | TCCGC    | TCCGG    |
| TCG | TCGAA  | TCGAT   | TCGAC    | TCGAG    | TCGTA    | TCGTT    | TCGTC    | TCGTG    | TCGCA    | TCGCT    | TCGCC    | TCGCG    | TCGGA    | TCGGT    | TCGGC    | TCGGG    |
| TGA | TGAAA  | TGAAT   | TGAAC    | TGAAG    | TGATA    | TGATT    | TGATC    | TGATG    | TGACA    | TGACT    | TGACC    | TGACG    | TGAGA    | TGAGT    | TGAGC    | TGAGG    |
| TGT | TGTAA  | TGTAT   | TGTAC    | TGTAG    | TGTTA    | TGT TT   | TGT TC   | TGT TG   | TGT CA   | TGT CT   | TGT CC   | TGT CG   | TGT GA   | TGT GT   | TGT GC   | TGT GG   |
| TGC | TGCAA  | TGCAT   | TGCAC    | TGCAG    | TGCTA    | TGCTT    | TGCTC    | TGCTG    | TGCCA    | TG CCT   | TGCCC    | TGCCG    | TGCCGA   | TGCCGT   | TGCCC    | TGCCG    |
| TGA | TGAAA  | TGAAT   | TGAAC    | TGAAG    | TGATA    | TGATT    | TGATC    | TGATG    | TGACA    | TGACT    | TGACC    | TGACG    | TGAGA    | TGAGT    | TGAGC    | TGAGG    |
| TGG | TGTAA  | TGTAT   | TGTAC    | TGTAG    | TGTTA    | TGT TT   | TGT TC   | TGT TG   | TGT CA   | TGT CT   | TGT CC   | TGT CG   | TGT GA   | TGT GT   | TGT GC   | TGT GG   |
| TGC | TGCAA  | TGCAT   | TGCAC    | TGCAG    | TGCTA    | TGCTT    | TGCTC    | TGCTG    | TGCCA    | TG CCT   | TGCCC    | TGCCG    | TGCCGA   | TGCCGT   | TGCCC    | TGCCG    |
| TGA | TGAAA  | TGAAT   | TGAAC    | TGAAG    | TGATA    | TGATT    | TGATC    | TGATG    | TGACA    | TGACT    | TGACC    | TGACG    | TGAGA    | TGAGT    | TGAGC    | TGAGG    |
| TGG | TGTAA  | TGTAT   | TGTAC    | TGTAG    | TGTTA    | TGT TT   | TGT TC   | TGT TG   | TGT CA   | TGT CT   | TGT CC   | TGT CG   | TGT GA   | TGT GT   | TGT GC   | TGT GG   |
| TGC | TGCAA  | TGCAT   | TGCAC    | TGCAG    | TGCTA    | TGCTT    | TGCTC    | TGCTG    | TGCCA    | TG CCT   | TGCCC    | TGCCG    | TGCCGA   | TGCCGT   | TGCCC    | TGCCG    |
| TGA | TGAAA  | TGAAT   | TGAAC    | TGAAG    | TGATA    | TGATT    | TGATC    | TGATG    | TGACA    | TGACT    | TGACC    | TGACG    | TGAGA    | TGAGT    | TGAGC    | TGAGG    |
| CAA | CAAAA  | CA AAT  | CA A AC  | CA A AG  | CA A TA  | CA A TT  | CA A TC  | CA A TG  | CA A CA  | CA A CT  | CA A CC  | CA A CG  | CA A GA  | CA A GT  | CA A GC  | CA A GG  |
| CAT | CATAA  | CATAT   | CATAC    | CATAG    | CATTA    | CATTT    | CATTC    | CAT TG   | CAT CA   | CAT CT   | CAT CC   | CAT CG   | CAT GA   | CAT GT   | CAT GC   | CAT GG   |
| CAC | CACAA  | CACAT   | CACAC    | CACAG    | CAC TA   | CAC TT   | CAC TC   | CAC TG   | CAC CA   | CAC CT   | CAC CC   | CAC CG   | CAC GA   | CAC GT   | CAC GC   | CAC GG   |
| CAG | CAGAA  | CAGAT   | CAGAC    | CAGAG    | CAG TA   | CAG TT   | CAG TC   | CAG TG   | CAG CA   | CAG CT   | CAG CC   | CAG CG   | CAG GA   | CAG GT   | CAG GC   | CAG GG   |
| CTA | CTAAA  | CT AAT  | CT A AC  | CT A AG  | CT A TA  | CT A TT  | CT A TC  | CT A TG  | CT A CA  | CT A CT  | CT A CC  | CT A CG  | CT A GA  | CT A GT  | CT A GC  | CT A GG  |
| CTT | CTTAA  | CTTAT   | CTTAC    | CTTAG    | CTTTA    | CTTTT    | CTTTC    | CTT TG   | CTT CA   | CTT CT   | CTT CC   | CTT CG   | CTT GA   | CTT GT   | CTT GC   | CTT GG   |
| CTC | CTCAA  | CTCAT   | CTCAC    | CTCAG    | CTCTA    | CTCTT    | CTCTC    | CTCTG    | CTCCA    | CT CCT   | CTCCC    | CTCCG    | CTCGA    | CTCGT    | CTCGC    | CTCCG    |
| CTG | CTGAA  | CTGAT   | CTGAC    | CTGAG    | CTGTA    | CTGTT    | CTGTC    | CTGTG    | CTGCA    | CTGCT    | CTGCC    | CTGCG    | CTGGA    | CTGGT    | CTGGC    | CTGGG    |
| CCA | CCAAA  | CC AAT  | CC A AC  | CC A AG  | CC A TA  | CC A TT  | CC A TC  | CC A TG  | CC A CA  | CC A CT  | CC A CC  | CC A CG  | CC A GA  | CC A GT  | CC A GC  | CC A GG  |
| CCT | CCTAA  | CCTAT   | CCTAC    | CCTAG    | CCTTA    | CCTTT    | CCTTC    | CCT TG   | CCT CA   | CCT CT   | CCT CC   | CCT CG   | CCT GA   | CCT GT   | CCT GC   | CCT GG   |
| CCC | CCCAA  | CCCAT   | CCCAC    | CCCAG    | CCCTA    | CCCTT    | CCCTC    | CCCTG    | CCCCA    | CC CCT   | CCCCC    | CCCCG    | CCCGA    | CCCGT    | CCCGC    | CCCCG    |
| CCG | CCGAA  | CCGAT   | CCGAC    | CCGAG    | CCG TA   | CCG TT   | CCG TC   | CCG TG   | CCG CA   | CCG CT   | CCG CC   | CCG CG   | CCG GA   | CCG GT   | CCG GC   | CCG GG   |
| CGA | CGAAA  | CG AAT  | CG A AC  | CG A AG  | CG A TA  | CG A TT  | CG A TC  | CG A TG  | CG A CA  | CG A CT  | CG A CC  | CG A CG  | CG A GA  | CG A GT  | CG A GC  | CG A GG  |
| CGT | CGTAA  | CGTAT   | CGTAC    | CGTAG    | CGTTA    | CGTTT    | CGTTC    | CGT TG   | CGT CA   | CGT CT   | CGT CC   | CGT CG   | CGT GA   | CGT GT   | CGT GC   | CGT GG   |
| CGC | CGCAA  | CGCAT   | CGCAC    | CGCAG    | CGCTA    | CGCTT    | CGCTC    | CGCTG    | CGCCA    | CG CCT   | CGCCC    | CGCCG    | CGCGA    | CGCGT    | CGCGC    | CGCCG    |
| CGG | CGGAA  | CGGAT   | CGGAC    | CGGAG    | CGG TA   | CGG TT   | CGG TC   | CGG TG   | CGG CA   | CGG CT   | CGGCC    | CGGCG    | CGGGA    | CGGGT    | CGGGC    | CGGGG    |
| GAA | GAAAA  | G A AAT | G A A AC | G A A AG | G A A TA | G A A TT | G A A TC | G A A TG | G A A CA | G A A CT | G A A CC | G A A CG | G A A GA | G A A GT | G A A GC | G A A GG |
| GAT | GATAA  | GATAT   | GATAC    | GATAG    | GATTA    | GATTT    | GATTC    | GAT TG   | GAT CA   | GAT CT   | GAT CC   | GAT CG   | GAT GA   | GAT GT   | GAT GC   | GAT GG   |
| GAC | GACAA  | GACAT   | GACAC    | GACAG    | GAC TA   | GAC TT   | GAC TC   | GAC TG   | GAC CA   | GAC CT   | GAC CC   | GAC CG   | GAC GA   | GAC GT   | GAC GC   | GAC GG   |
| GAG | GAGAA  | GAGAT   | GAGAC    | GAGAG    | GAG TA   | GAG TT   | GAG TC   | GAG TG   | GAG CA   | GAG CT   | GAG CC   | GAG CG   | GAG GA   | GAG GT   | GAG GC   | GAG GG   |
| GTA | GTA AA | GTAAT   | GTAAC    | GTAAG    | GTA TA   | GTA TT   | GTA TC   | GTA TG   | GTA CA   | GTA CT   | GTA CC   | GTA CG   | GTA GA   | GTA GT   | GTA GC   | GTA GG   |
| GTT | GTTAA  | GTTAT   | GTTAC    | GTTAG    | GTTTA    | GTTTT    | GTTTC    | GTT TG   | GTT CA   | GTT CT   | GTT CC   | GTT CG   | GTT GA   | GTT GT   | GTT GC   | GTT GG   |
| GTC | GTC AA | GTCAT   | GTCAC    | GTCAG    | GTC TA   | GTC TT   | GTC TC   | GTC TG   | GTC CA   | GTC CT   | GTC CC   | GTC CG   | GTC GA   | GTC GT   | GTC GC   | GTC GG   |
| GTG | GTCAA  | GTGAT   | GTGAC    | GTGAG    | GTG TA   | GTG TT   | GTG TC   | GTG TG   | GTG CA   | GTG CT   | GTGCC    | GTGCG    | GTGGA    | GTGGT    | GTGGC    | GTGGG    |
| GCA | GCAAA  | GCAAT   | GCAAC    | GCAAG    | GCA TA   | GCA TT   | GCA TC   | GCA TG   | GCA CA   | GCA CT   | GCA CC   | GCA CG   | GCA GA   | GCA GT   | GCA GC   | GCA GG   |
| GCT | GCTAA  | GCTAT   | GCTAC    | GCTAG    | GCTTA    | GCTTT    | GCTTC    | GCT TG   | GCT CA   | GCT CT   | GCT CC   | GCT CG   | GCT GA   | GCT GT   | GCT GC   | GCT GG   |
| GCC | GCCAA  | GCCAT   | GCCAC    | GCCAG    | GCC TA   | GCC TT   | GCC TC   | GCC TG   | GCC CA   | GCC CT   | GCC CC   | GCC CG   | GCC GA   | GCC GT   | GCC GC   | GCC GG   |
| GCG | GCGAA  | GCGAT   | GCGAC    | GCGAG    | GCG TA   | GCG TT   | GCG TC   | GCG TG   | GCG CA   | GCG CT   | GCG CC   | GCG CG   | GCG GA   | GCG GT   | GCG GC   | GCG GG   |
| GGA | GGA AA | GGAAT   | GGAAC    | GGAAG    | GGA TA   | GGA TT   | GGA TC   | GGA TG   | GGA CA   | GGA CT   | GGA CC   | GGA CG   | GGA GA   | GGA GT   | GGA GC   | GGA GG   |
| GGT | GGTAA  | GGTAT   | GGTAC    | GGTAG    | GGT TA   | GGT TT   | GGT TC   | GGT TG   | GGT CA   | GGT CT   | GGT CC   | GGT CG   | GGT GA   | GGT GT   | GGT GC   | GGT GG   |
| GGC | GGCAA  | GGCAT   | GGCAC    | GGCAG    | GGCTA    | GGCTT    | GGCTC    | GGCTG    | GGCCA    | GG CCT   | GGCCC    | GGCCG    | GGCGA    | GGCGT    | GGCGC    | GGCCG    |
| GGG | GGGAA  | GGGAT   | GGGAC    | GGGAG    | GGG TA   | GGG TT   | GGG TC   | GGG TG   | GGG CA   | GGG CT   | GGGCC    | GGGCG    | GGGGA    | GGGGT    | GGGGC    | GGGGG    |

- A(24.63%)
- T(22.17%)
- C(26.90%)
- G(26.28%)
- N(0.000%)
- GC(53.19%)



```
/home/ec2-user/tools/fastp/fastp-0.20.0/fastp -w 16 --detect_adapter_for_pe -W 4 -M 10 --cut_by_quality3 --length_required 15 -i
/bp/analysis/83470/HNMT1.R1.fastq.gz -o /bp/analysis/83470/HNMT1.R1.trimmed.fastq.gz -I /bp/analysis/83470/HNMT1.R2.fastq.gz -O
/bp/analysis/83470/HNMT1.R2.trimmed.fastq.gz -h /bp/analysis/83470/HNMT1.trim.report.html -j /bp/analysis/83470/HNMT1.trim.report.json
```

fastp 0.20.0, at 2022-01-03 05:19:07
